# Supplementary material
Source: Springer Nature journal article supplement (https://www.springermedizin.de/resource/supplementary/13256_2011_2148_MOESM2_ESM.pdf/9649088)

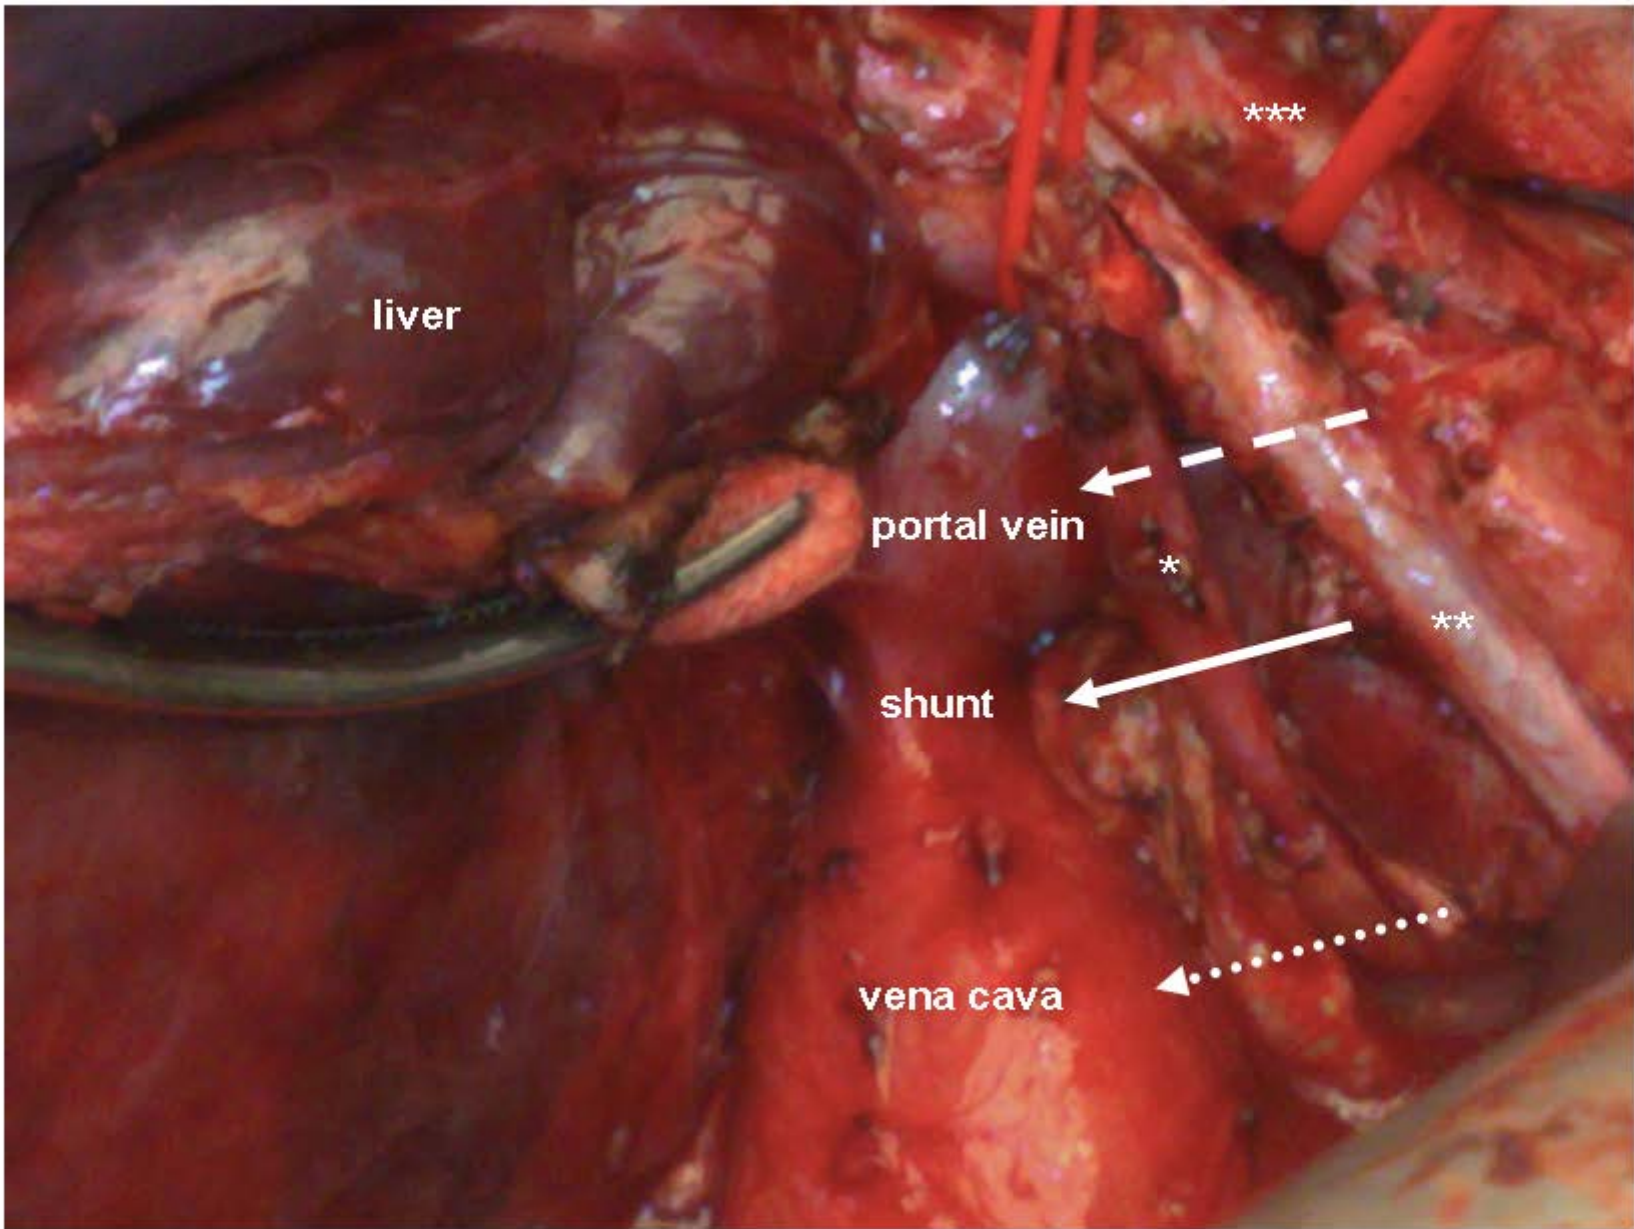

- ← shunt
- ← - - portal vein
- ← ····· vena cava

- \* aberrant hepatic artery
- \*\* Common bile duct
- \*\*\* Common hepatic artery

Supplement: MOESM2 [file 9649088]
